# Supplementary material for: Dendritic cell-elicited B-cell activation fosters immune privilege via IL-10 signals in hepatocellular carcinoma
Source: PubMed Central journal article supplement (PMC5118541; doi:10.1038/ncomms13453), 2016-11-17
Supplement: ncomms13453-s1.pdf [file ncomms13453-s1.pdf]

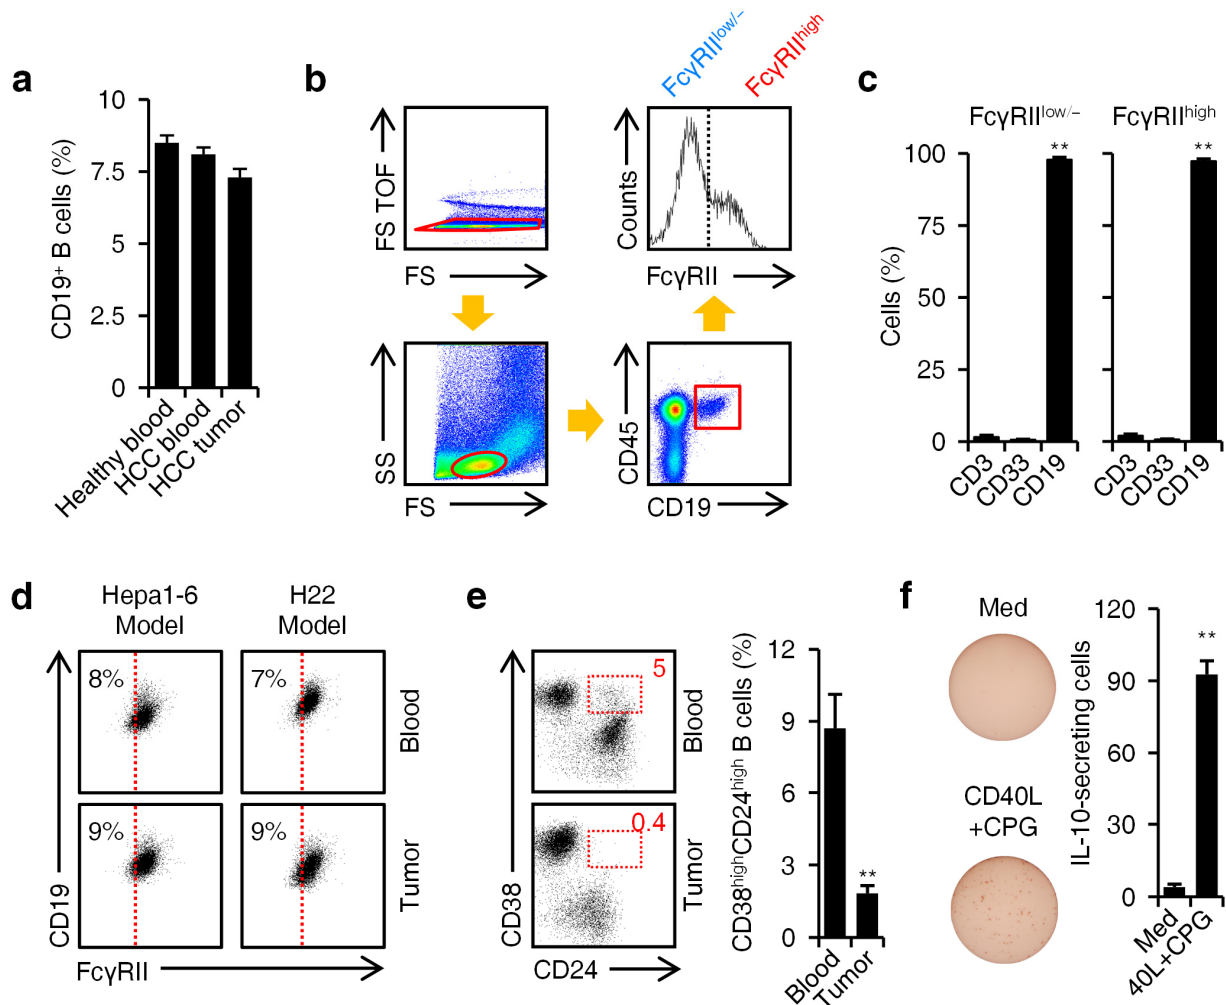

**Supplementary Fig. 1: Proportion, subset composition, gating strategy of B cells from blood and HCC tumor samples.**

(a) FACS analysis of CD19<sup>+</sup> B cells to CD45<sup>+</sup> mononuclear cells in healthy blood (n = 10) and paired blood and HCC tumor (n = 25) samples. (b) Gating strategy for FACS analysis. Mononuclear cells from blood or HCC tissue were first gated for singlets (FS-TOF vs. FS) and lymphocytes (SS vs. FS), and thereafter, the CD45<sup>+</sup>CD19<sup>+</sup> B lymphocytes were further divided into FcγRII<sup>low/-</sup> and FcγRII<sup>high</sup> subsets. (c) Expression of CD3, CD19, and CD33 in HCC tumor-derived FcγRII<sup>low/-</sup> and FcγRII<sup>high</sup> B cells was determined by FACS (n = 5). (d) Murine Hepa1-6 and H22 hepatoma cells (10<sup>6</sup>) in 25 μl Matrigel (Corning) were injected under the hepatic capsule of 5–7-week-old female C57BL/6 mice and BABL/c mice, respectively, for 25 days. Thereafter, the expression of FcγRII on blood and tumor B cells from both models was determined by FACS (n = 5 for each). (e) FACS analysis of CD24<sup>high</sup>CD38<sup>high</sup> B cell proportions in B cells from paired blood and HCC tumor (n = 10). (f) Sorted blood CD38<sup>high</sup>CD24<sup>high</sup> B cells (n = 5) were left untreated or stimulated with 1 μg/ml CD40L plus 2 μg/ml CpG for 24 h. IL-10 production was determined by ELISpot. \*P < 0.05, \*\*P < 0.01 (Student's t test). Error bars, s.e.m.

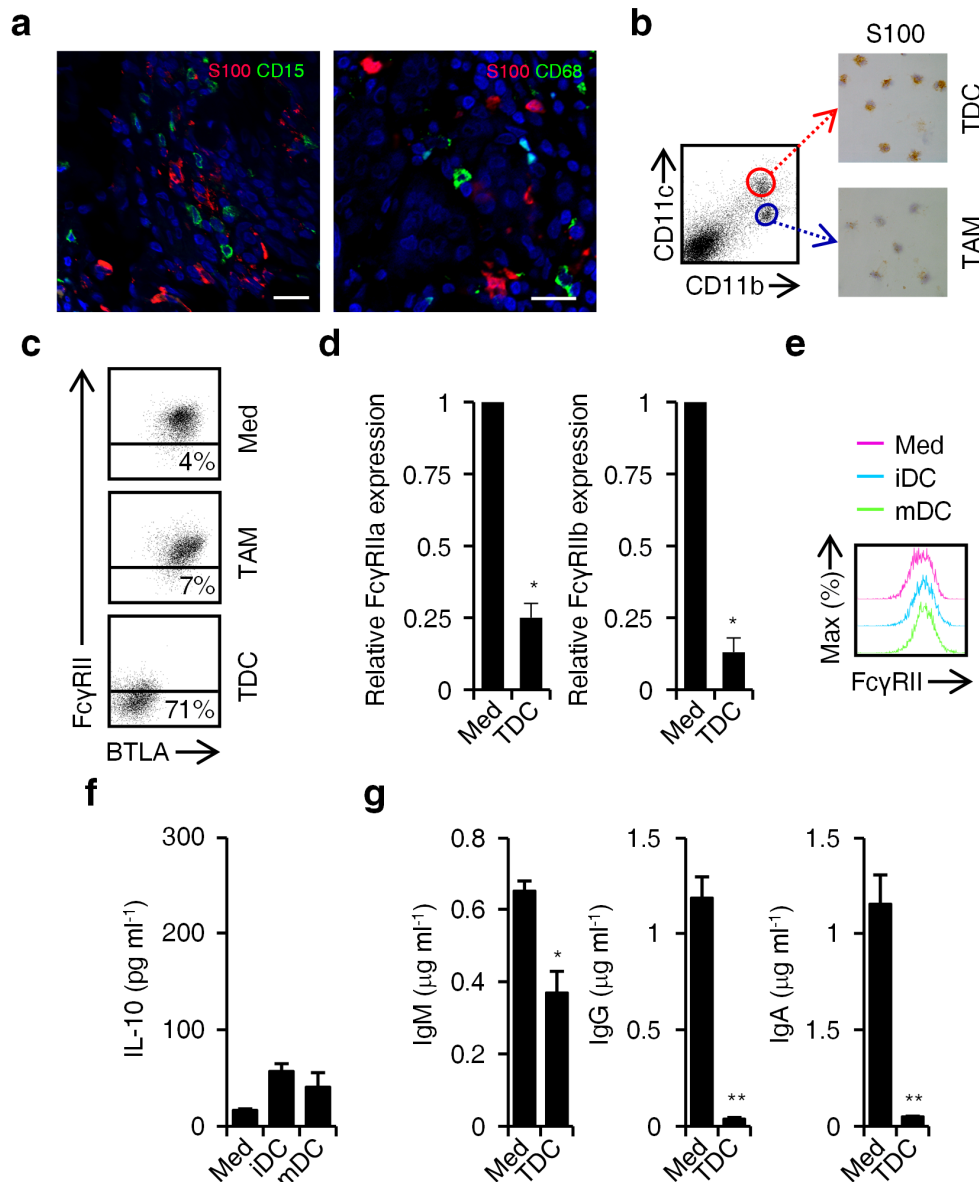

**Supplementary Fig. 2: Effects of DCs on B cell activation, maturation, and IL-10 production.** (a) Detection of S100 (red) and CD15 (green), or S100 (red) and CD68 (green) ( $n = 8$ ) in peritumoral stroma by immunofluorescence. Scale bar, 50  $\mu\text{m}$ . (b) Representative S100 staining in sorted TDCs and TAMs purified from HCC tumors ( $n = 4$ ). (c) HCC tumor-derived TDCs, but not  $\text{CD11c}^{\text{low}}\text{CD11b}^{\text{high}}$  macrophages (TAMs), effectively induced  $\text{Fc}\gamma\text{RII}^{\text{low/-}}\text{BTLA}^{\text{low/-}}$  B cells. (d) Blood B cells were left untreated or cultured with TDCs for 2 days. Thereafter, the B cells were sorted and the expression of  $\text{Fc}\gamma\text{RIIa}$  and  $\text{Fc}\gamma\text{RIIb}$  in these cells was determined by real-time PCR. (e,f) Effect of normal immature DCs (iDCs) and mature DCs (mDCs) on generation of IL-10-producing  $\text{Fc}\gamma\text{RII}^{\text{low/-}}$  B cells. Peripheral  $\text{CD19}^+$  B cells were cultured in medium or with iDCs or mDCs for 24 hrs. Thereafter, B cells were purified by  $\text{CD19}^+$  beads and then cultured for additional 24 hr in medium alone. Expression of  $\text{Fc}\gamma\text{RII}$  in B cells was determined by FACS. Concentration of IL-10 in culture supernatant was determined by ELISA. (g) B cells left untreated (Med) or cultured with TDCs for 2 days were stimulated with CD40L plus IL-21 for 6 days. IgM, IgG and IgA production were determined by ELISA. Results (c-g) represent three independent experiments ( $n = 5$ ). \* $P < 0.05$ , \*\* $P < 0.01$  (Student's t test). Error bars, s.e.m.

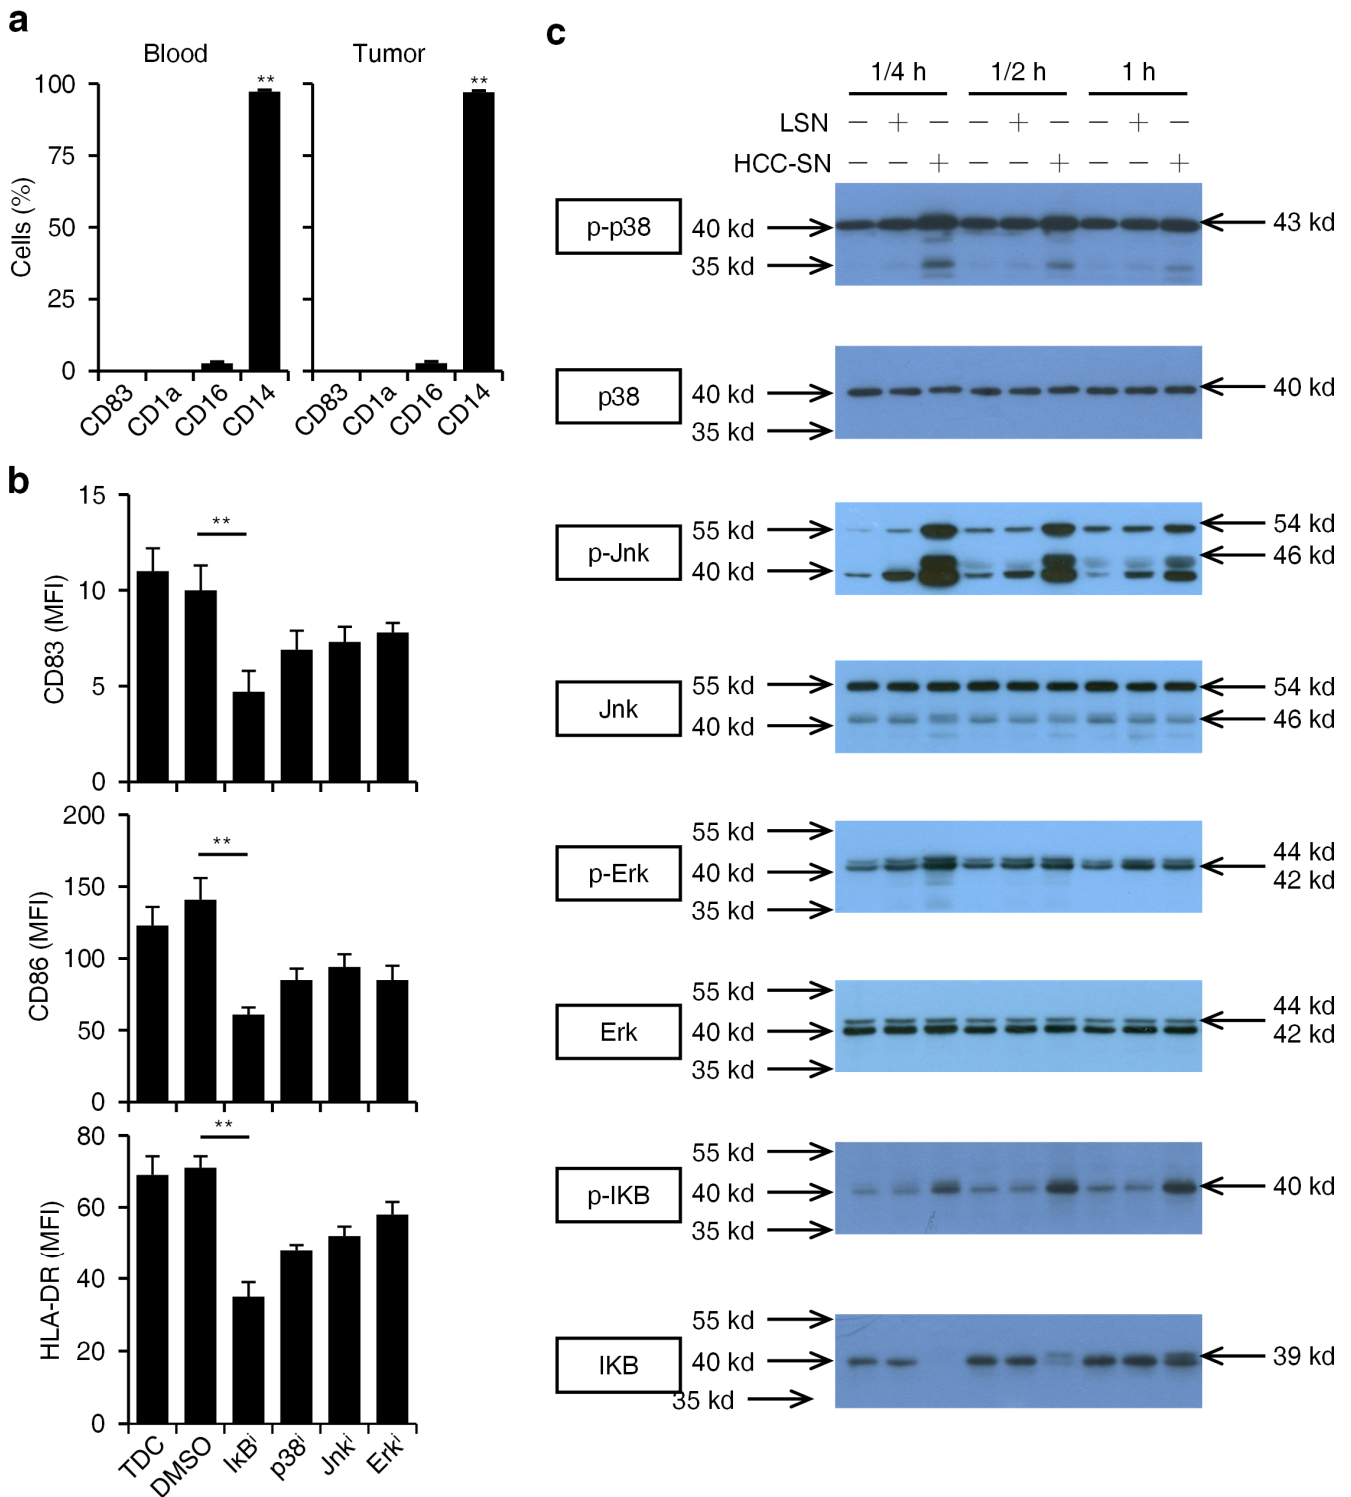

**Supplementary Fig. 3: Effects of HCC-SN on DC maturation.**

(a) Expression of CD1a, CD14, CD16, and CD83 in HCC blood- and tumor-derived CD14<sup>+</sup> monocytes was determined by FACS (n = 5). (b) Suppression of IκBα, but not Erk1/2, p38, or Jnk, in HCC-SN-pretreated monocytes attenuated HCC-SN-mediated DC semimaturational. Expression of CD83, CD86, and HLA-DR was determined by FACS (n = 3). (c) Uncropped western blot images of Fig. 3g. \*P < 0.05, \*\*P < 0.01 (Student's t test). Error bars, s.e.m.

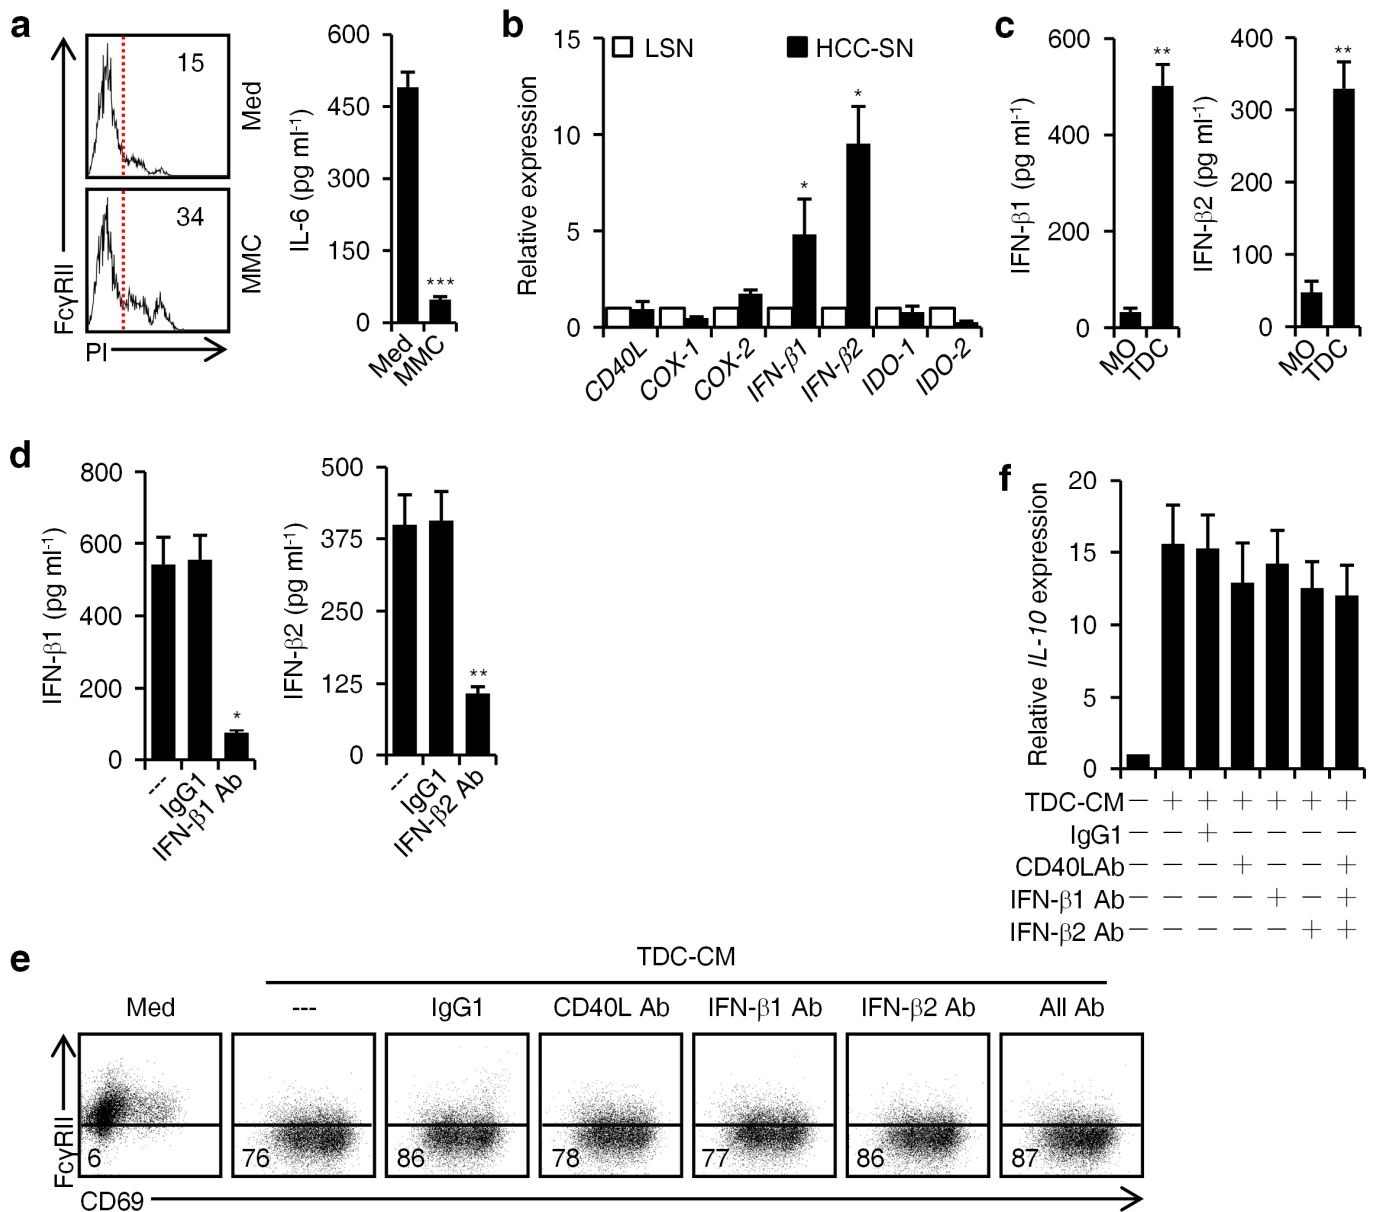

**Supplementary Fig. 4: Effects of IFN-β1 and IFN-β2 on TDC-CM-elicited IL-10-producing FcγRII<sup>low/-</sup> B cell generation.**

(a) Effect of mitomycin C (10 μg ml<sup>-1</sup>) on TDC survival and cytokine production. (b) Real-time PCR analysis of immune regulatory molecule expression in DCs generated from blood monocytes that were pretreated for 1 hr with HCC-SN or LSN. (c) Detection of 24-hr IFN-β1 and IFN-β2 production in TDCs compared with paired blood monocytes using ELISA (n = 5). (d-f) Blocking IFN-β1, IFN-β2, and/or CD40L did not affect TDC-CM-elicited IL-10-producing FcγRII<sup>low/-</sup> B cell generation. Peripheral CD19<sup>+</sup> B cells were cultured in medium or TDC-CM for 24 hrs. Thereafter, B cells were washed and then cultured for additional 24 hr in medium alone. The blocking effects of IFN-β1 and IFN-β2 in TDC-CM by specific mAbs were determined by ELISA (d). Expression of FcγRII in B cells was determined by FACS (e). Real-time PCR analysis of IL-10 expression in B cells (f). Results shown represent three independent experiments (n = 4). \*P < 0.05, \*\*P < 0.01 (Student's t test). Error bars, s.e.m.

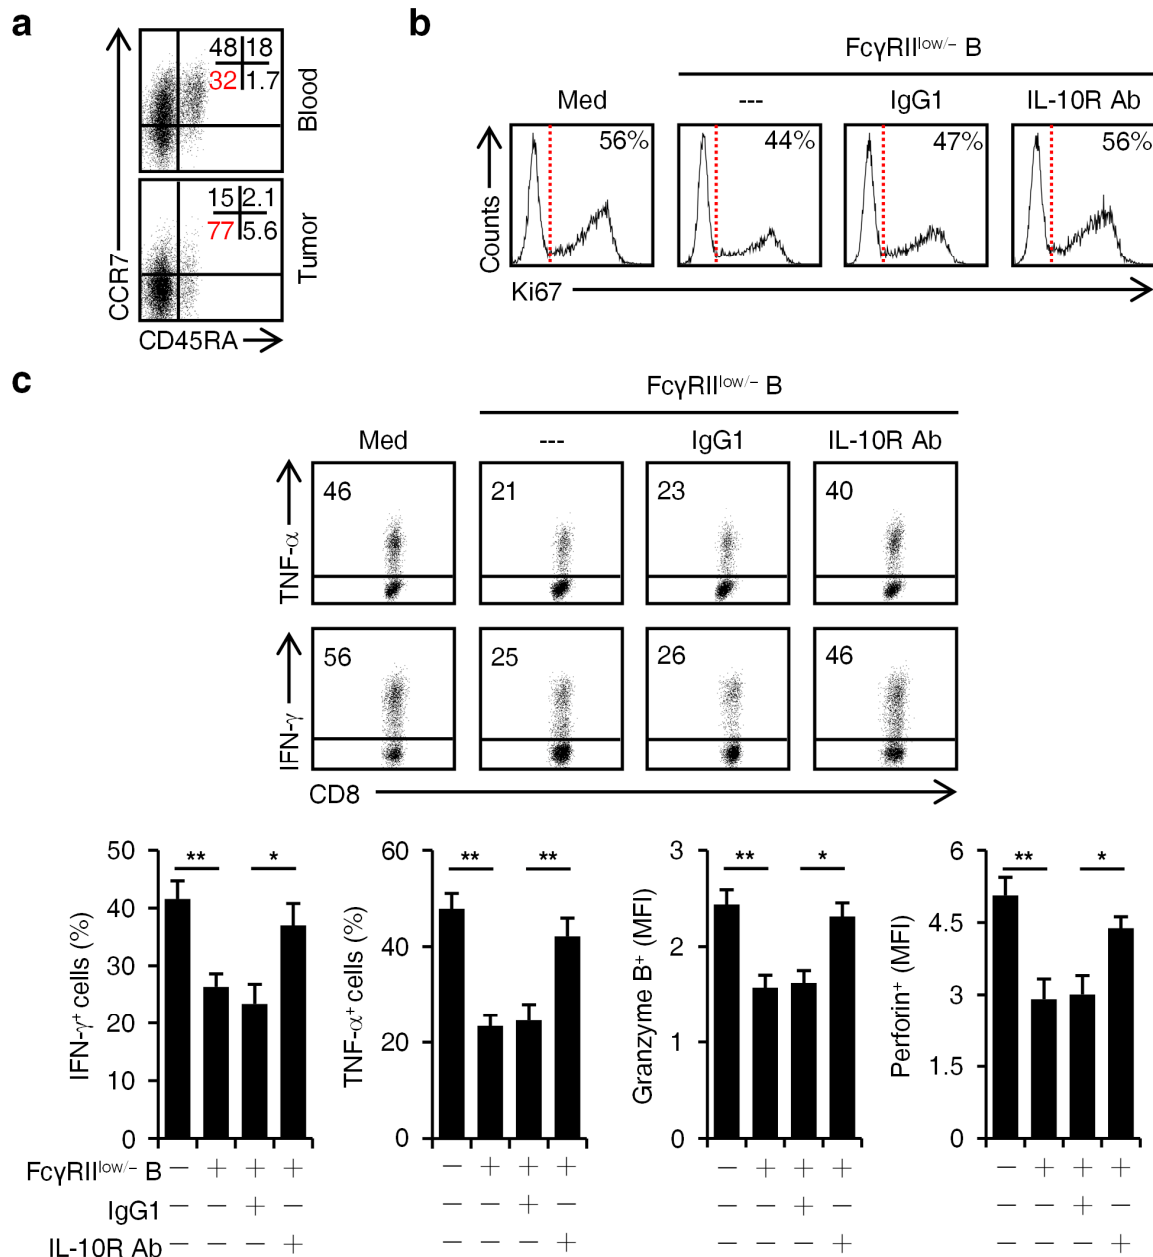

**Supplementary Figure 5: Effects of tumor-derived or TDC-induced FcγRII<sup>low/-</sup> B cells on cytotoxic T cell immunity.**

(a) Expression of CD45RA and CCR7 on CD8<sup>+</sup> T cells from paired blood and HCC tumor was determined by FACS (n = 6). (b) HCC tumor-derived CD8<sup>+</sup> T cells were left untreated or cultured with sorted tumor FcγRII<sup>low/-</sup> B cells in the presence or absence of an anti-IL10R or a control Ab. FACS analysis of Ki67 expression in CD8<sup>+</sup> T cells is shown. Results represent three independent experiments (n = 5). (c) CD8<sup>+</sup> T cells were left untreated or cultured with autologous HCC-SN/DC-induced FcγRII<sup>low/-</sup> B cells in the presence or absence of an anti-IL10R or a control Ab. Expression of proinflammatory TNF-α and IFN-γ and cytotoxic granzyme B and perforin in CD8<sup>+</sup> T cells activated by polyclonal stimulations was detected by FACS. Results represent three independent experiments (n = 3). \*P < 0.05, \*\*P < 0.01 and \*\*\*P < 0.001 (Student's t test). Error bars, s.e.m.

**Supplementary Table 1. Clinical characteristics of 160 HCC Patients**

| <b>Patient characteristics</b>                              | <b>Cohort 1</b>  | <b>Cohort 2</b> |
|-------------------------------------------------------------|------------------|-----------------|
| No. of patients                                             | 25               | 135             |
| Age, years (median, range)                                  | 53, 32-72        | 48, 24-75       |
| Sex (male/female)                                           | 22/3             | 124/11          |
| HbsAg (negative/positive)                                   | 8/17             | 14/121          |
| Cirrhosis (absent/present)                                  | 10/15            | 20/115          |
| ALT, U/L (median, range)                                    | 51.5, 24.3-484.2 | 41, 8-932       |
| AFP, ng/ml ( $\leq 25$ / $> 25$ )                           | 16/9             | 44/91           |
| Tumor size, cm ( $\leq 5$ / $> 5$ )                         | 11/14            | 62/73           |
| Tumor multiplicity (solitary/multiple)                      | 20/5             | 113/22          |
| Vascular invasion (absent/present)                          | 21/4             | 130/5           |
| Intrahepatic metastasis (no/yes)                            | 22/3             | 119/16          |
| TNM stage (I+II/III+IV)                                     | 14/11            | 104/31          |
| Tumor differentiation (I+II/III+IV)                         | 7/18             | 110/25          |
| Fibrous capsule (absent/present)                            | 10/15            | 29/106          |
| Nontumoral S100 <sup>+</sup> cells density (median, range)  | N/A              | 0.5, 0-34       |
| Peritumoral stromal S100 <sup>+</sup> cells (median, range) | N/A              | 20.5, 0-72.5    |
| Intratumoral S100 <sup>+</sup> cells (median, range)        | N/A              | 0.2, 0-18       |

**Supplementary Table 2: Univariate and multivariate analyses of factors associated with survival**

| Variables                                   | Univariate |              |                  | Multivariate |             |              |
|---------------------------------------------|------------|--------------|------------------|--------------|-------------|--------------|
|                                             |            |              | P value          | HR           | 95%CI of HR | P value      |
| Age, years                                  | >48        | vs. ≤48      | <b>0.036</b>     | 1.521        | 0.859-2.693 | 0.151        |
| Gender                                      | female     | vs. male     | 0.405            |              |             |              |
| HBsAg                                       | positive   | vs. negative | 0.380            |              |             |              |
| Cirrhosis                                   | high       | vs. absent   | 0.829            |              |             |              |
| ALT, U/L                                    | >41        | vs. ≤41      | 0.997            |              |             |              |
| AFP, ng/ml                                  | >25        | vs. ≤25      | 0.121            |              |             |              |
| Tumor size, cm                              | >5         | vs. ≤5       | <b>0.003</b>     | 1.707        | 0.902-3.232 | 0.100        |
| Tumor multiplicity                          | multiple   | vs. solitary | <b>&lt;0.001</b> | 1.331        | 0.440-4.022 | 0.613        |
| Vascular invasion                           | present    | vs. absent   | 0.097            |              |             |              |
| Intrahepatic metastasis                     | yes        | vs. no       | <b>&lt;0.001</b> | 3.331        | 1.372-8.089 | <b>0.008</b> |
| TNM stage                                   | III+IV     | vs. I + II   | <b>0.006</b>     | 0.920        | 0.352-2.404 | 0.864        |
| Tumor differentiation                       | III+IV     | vs. I + II   | 0.147            |              |             |              |
| Fibrous capsule                             | present    | vs. absent   | 0.451            |              |             |              |
| Nontumoral S100 <sup>+</sup> cells          | >0.5       | vs. ≤0.5     | 0.074            |              |             |              |
| Peritumoral stromal S100 <sup>+</sup> cells | >20.5      | vs. ≤20.5    | <b>0.008</b>     | 1.973        | 1.059-3.675 | <b>0.032</b> |
| Intratumoral S100 <sup>+</sup> cells        | >0         | vs. ≤0       | 0.86             |              |             |              |

**Supplementary Table 3: Fluorochrome-conjugated antibodies used in flow cytometry**

| <b>Species</b> | <b>Source</b>    | <b>Antigen</b> | <b>Fluorochrome</b> | <b>Clone</b> | <b>Supplier</b> |
|----------------|------------------|----------------|---------------------|--------------|-----------------|
| Human          | Mouse            | BTLA           | PE                  | J168-540     | BD Pharmingen   |
| Human          | Mouse            | CCR1           | Alexa Fluor 647     | 53504        | BD Pharmingen   |
| Human          | Mouse            | CCR2           | Alexa Fluor 647     | 48607        | BD Pharmingen   |
| Human          | Mouse            | CCR6           | PE                  | 11A9         | BD Pharmingen   |
| Human          | Rat              | CCR7           | PE                  | 3D12         | BD Pharmingen   |
| Human          | Armenian hamster | CCR10          | PE                  | 6588-5       | Biolegend       |
| Human          | Mouse            | CD11b          | Alexa Fluor 700     | CBRM1/5      | eBioscience     |
| Human          | Mouse            | CD11c          | PE                  | 3.9          | eBioscience     |
| Human          | Mouse            | CD14           | FITC                | 61D3         | eBioscience     |
| Human          | Mouse            | CD15           | Pacific Blue        | MMA          | eBioscience     |
| Human          | Mouse            | CD16           | FITC                | 3G8          | BioLegend       |
| Human          | Mouse            | CD19           | PE-Cy7              | J3-119       | Beckman Coulter |
| Human          | Mouse            | CD19           | BV421               | HIB19        | BioLegend       |
| Human          | Mouse            | CD24           | Alexa Fluor 780     | eBioSN3      | eBioscience     |
| Human          | Mouse            | CD3            | Alexa Fluor 700     | OKT3         | eBioscience     |
| Human          | Mouse            | CD32           | APC                 | 6C4 (CD32)   | eBioscience     |
| Human          | Mouse            | CD32           | PE-Cy7              | 6C4 (CD32)   | eBioscience     |
| Human          | Mouse            | CD33           | APC                 | D3HL60.251   | Beckman Coulter |
| Human          | Mouse            | CD38           | FITC                | HIT2         | BD Pharmingen   |
| Human          | Mouse            | CD45           | Krome Orange        | J.33         | Beckman Coulter |
| Human          | Mouse            | CD45RA         | Pacific Blue        | HI100        | BioLegend       |
| Human          | Mouse            | CD45RO         | PE                  | UCHL1        | BD Pharmingen   |
| Human          | Mouse            | CD62L          | PE                  | DREG-56      | BD Pharmingen   |
| Human          | Mouse            | CD69           | PE                  | TP1.55.3     | Beckman Coulter |
| Human          | Mouse            | CD8            | FITC                | B9.11        | Beckman Coulter |
| Human          | Mouse            | CD83           | FITC                | HB15e        | BioLegend       |
| Human          | Mouse            | CD86           | APC                 | 2331 (FUN-1) | BD Pharmingen   |
| Human          | Mouse            | CD95           | PE-Cy5              | DX2          | eBioscience     |
| Human          | Rat              | CXCR5          | Alexa Fluor 647     | RF8B2        | BD Pharmingen   |
| Human          | Mouse            | HLA-DR         | Pacific Blue        | Immu-357     | Beckman Coulter |
| Human          | Mouse            | Granzyme B     | PE                  | GB11         | eBioscience     |
| Human          | Mouse            | Perforin       | APC                 | delta G9     | eBioscience     |
| Human          | Rat              | IFN- $\gamma$  | Alexa Fluor 647     | XMG1.2       | BD Pharmingen   |
| Human          | Mouse            | IFN- $\gamma$  | PE                  | 45.15        | Beckman Coulter |
| Human          | Mouse            | TNF- $\alpha$  | PE                  | IPM2         | Beckman Coulter |
| Human          | Mouse            | IgM            | FITC                | UHB          | Beckman Coulter |
| Human          | Goat             | IgA            | PE                  | N/A          | SouthernBiotech |
| Human          | Mouse            | IgD            | Alexa Fluor 700     | IA6-2        | BD Pharmingen   |
| Human          | Mouse            | IgG            | APC-H7              | G18-145      | BD Pharmingen   |
| Human          | Rat              | IL-10R         | APC                 | 3F9          | BioLegend       |
| Human          | Mouse            | Ki67           | PE                  | B56          | BD Pharmingen   |



**Supplementary Table 4: Primers for real-time PCR**

| <b>Gene</b>                          |         | <b>Sequence</b>               |
|--------------------------------------|---------|-------------------------------|
| Human <i>CD95L</i>                   | Forward | GGT CCA TGC CTC TGG AAT GG    |
|                                      | Reverse | CAC ATC TGC CCA GTA GTG CA    |
| Human <i>CD40L</i>                   | Forward | AAT TGC GGC ACA TGT CAT AA    |
|                                      | Reverse | GTT TCC CAT TTT CCA GGG TT    |
| Human <i>COX-1</i>                   | Forward | TAC CAG GTG CTG GAT GGA GA    |
|                                      | Reverse | CCT TCA GCA GGT CAC ACA C     |
| Human <i>COX-2</i>                   | Forward | GTT TTG ACA TGG GTG GGA AC    |
|                                      | Reverse | CCC TCA GAC AGC AA AGC CTA    |
| Human <i>IFN-<math>\beta</math>1</i> | Forward | CGA CAC TGT TCG TGT TGT CA    |
|                                      | Reverse | GAA GCA CAA CAG GAG AGC AA    |
| Human <i>IFN-<math>\beta</math>2</i> | Forward | TCA GCC CTG AGA AAG GAG ACA   |
|                                      | Reverse | GAT TTT CAC CAG GCA AGT CTC C |
| Human <i>IDO-1</i>                   | Forward | ACA GAC CAC AAG TCA CAG CG    |
|                                      | Reverse | TTT GCC AAG ACA CAG TCT GC    |
| Human <i>IDO-2</i>                   | Forward | CTG GTC CTG AGC TTC CTC AC    |
|                                      | Reverse | CAG CAC CAA GTC TGA GTG GA    |
| Human <i>IL-10</i>                   | Forward | CAA CCT GCC TAA CAT GCT TC    |
|                                      | Reverse | CCT TGA TGT CTG GGT CTT GG    |
| Human <i>GAPDH</i>                   | Forward | GAG TCA ACG GAT TTG GTC GT    |
|                                      | Reverse | GAC AAG CTT CCC GTT CTC AG    |

**Supplementary Table 5: Antibodies against human antigens used in immunoblotting, IHC, and IF**

| <b>Antigen</b> | <b>Source</b> | <b>Clone</b> | <b>Supplier</b>           | <b>Dilution</b> | <b>Application</b> |
|----------------|---------------|--------------|---------------------------|-----------------|--------------------|
| Phospho-p38    | Rabbit        | D3F9         | Cell Signaling Technology | 1:1000          | immunoblotting     |
| p38            | Rabbit        | D13E1        | Cell Signaling Technology | 1:1000          | immunoblotting     |
| Phospho-Jnk    | Rabbit        | 98F2         | Cell Signaling Technology | 1:1000          | immunoblotting     |
| Jnk            | Rabbit        | 56G8         | Cell Signaling Technology | 1:1000          | immunoblotting     |
| Phospho-Erk    | Rabbit        | 20G11        | Cell Signaling Technology | 1:1000          | immunoblotting     |
| Erk            | Rabbit        | 137F5        | Cell Signaling Technology | 1:1000          | immunoblotting     |
| Phospho- IκBα  | Rabbit        | 14D4         | Cell Signaling Technology | 1:500           | immunoblotting     |
| IκBα           | Mouse         | L35A5        | Cell Signaling Technology | 1:1000          | immunoblotting     |
| CD20           | Rabbit        | EP7          | ZSbio                     | 1:200           | IHC/IF             |
| S100           | Mouse         | 15E2E2+4C4.9 | ZSbio                     | 1:200           | IHC                |
| CD68           | Mouse         | PG-M1        | Dako                      | 1:200           | IHC                |
| CD8            | Mouse         | Ab-3         | Neomarkers                | 1:200           | IHC                |
